# Supplementary material for: Direct evidence of a multicentre halogen bond: unexpected contraction of the P–XXX–P fragment in triphenylphosphine dihalides
Source: Royal Society of Chemistry journal article supplement (doi:10.1039/c2cc38363b), 2012-12-21
Supplement: c2cc38363b.pdf [file c2cc38363b.pdf]

## **Electronic Supplementary Information**

**Direct evidence of a polycentre halogen bond: unexpected contraction of the P-XXX-P fragment in triphenylphosphine dihalides**

Kirill Nikitin, Helge Müller-Bunz, Declan Gilheany

**General methods:** All reactions were carried out under a nitrogen atmosphere in Schlenk-type reaction vessels. Dry degassed solvents were stored in Young-type flasks over molecular sieves 4A. NMR spectra were acquired on a Varian VNMRS 400 MHz spectrometer at 30 °C. Assignments were based on standard  $^1\text{H}$ - $^1\text{H}$  and  $^1\text{H}$ - $^{13}\text{C}$  two-dimensional techniques.

**Chlorotriphenylphosphonium chloride (1C).** To a solution of triphenylphosphine oxide (0.28 g, 1 mmol) in DCM (2 mL) oxalyl chloride (0.16 mL, 2 mmol) was added *via* a syringe. Upon the evolution of gases the reaction mixture was slowly concentrated under reduced pressure to furnish **1C** ( $\text{Ph}_3\text{PCl}_2 \cdot \text{CH}_2\text{Cl}_2$ , 415 mg, 98%) as colourless cubic crystals.  $^1\text{H}$  NMR ( $\text{CD}_2\text{Cl}_2$ , 400 MHz, numbering in accord with Figure S1):  $\delta$  8.00 (3H, t,  $J = 8$  Hz, 4-H), 7.80 (6H, dd,  $J = 8$  Hz,  $J = 16$  Hz, 2-H), 7.85 (6H, m,  $J = 8$  Hz, 3-H);  $^{31}\text{P}$  NMR (161 MHz):  $\delta$  62.1;  $^{13}\text{C}$  NMR (100 MHz):  $\delta$  137.2 ( $J = 3$  Hz, 4-C), 133.5 ( $J = 13$  Hz, 2-C), 130.8 ( $J = 14$  Hz, 3-C), 119.2 ( $J = 95$  Hz, 1-C). **Crystal data:** cubic,  $a = 15.995$  Å, identical to the previously published  $[\text{Ph}_3\text{P}-\text{Cl}-\text{C}-\text{Cl}-\text{PPh}_3]\text{Cl} \cdot 2\text{CH}_2\text{Cl}_2$  (Ref. 7a of the main text; CCDC 717813).

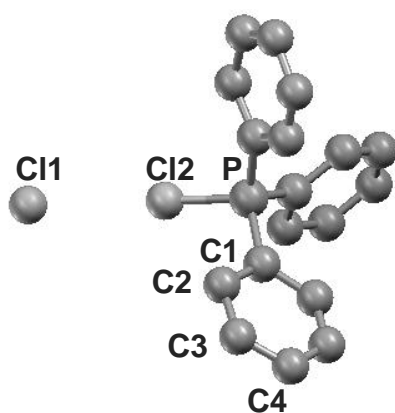

**Fig. S1.** Atom numbering in the structure of **1C**.

**Bromotriphenylphosphonium bromide (2C).** To a solution of triphenylphosphine oxide (0.14 g, 0.5 mmol) in DCM (2 mL) oxalyl bromide (0.1 mL, 1.1 mmol) was added *via* a syringe. Upon the evolution of gases was complete the reaction mixture was slowly concentrated under reduced pressure to furnish **2C** ( $\text{Ph}_3\text{PBr}_2 \cdot \text{CH}_2\text{Cl}_2$ , 490 mg, 97%) as yellow cubic crystals.  $^1\text{H}$  NMR ( $\text{CD}_2\text{Cl}_2$ , 400 MHz, numbering in accord with Figure S1):  $\delta$  7.70 (3H, m, 4-H), 7.69 (6H, m, 2-H), 7.43 (6H, m, 3-H);  $^{31}\text{P}$  NMR (161 MHz):  $\delta$  51.1;  $^{13}\text{C}$  NMR (100 MHz):  $\delta$  134.8 ( $J = 3$  Hz, 4-C), 133.1 ( $J = 12$  Hz, 2-C), 129.3 ( $J = 13$  Hz, 3-C), 123.6 ( $J = 108$  Hz, 1-C). **Crystal data.** molecular formula  $[\text{C}_{18}\text{H}_{15}\text{PBr}]^+[\text{Br}]^-\cdot\text{CH}_2\text{Cl}_2$ ; cubic  $a = b = c = 16.1626(2)$ ,  $\alpha = \gamma = \beta = 90^\circ$ ,  $U = 4222.15(9) \text{ \AA}^3$ ,  $T = 100$  K, space group  $Pa-3$ ,  $Z = 8$ , independent reflections 1127,  $R_{\text{int}} = 0.0458$ ,  $R$  indices (all data)  $R_1 = 0.0454$ ,  $wR_2 = 0.1294$ .

**Chlorotriphenylphosphonium bromide (3C).** To a DCM solution of **1C** (0.17 g, 0.4 mmol) a solution of **2C** (0.1 g, 0.2 mmol) in DCM was added *via* a syringe. The reaction mixture was slowly concentrated under reduced pressure until precipitation of the product began. Separation of the mother liquor gave **3C** ( $\text{Ph}_3\text{PCl}_{1.31}\text{Br}_{0.69} \cdot \text{CH}_2\text{Cl}_2$ , 72 mg, 0.16 mmol, 26%) as a pale yellow crystalline material. **Crystal data.** Molecular formula  $[\text{C}_{19}\text{H}_{17}\text{PCl}]^+[\text{Cl}]^{-0.31}[\text{Br}]^{-0.69} \cdot \text{CH}_2\text{Cl}_2$ ; cubic  $a = b = c = 15.9738(2)$ ,  $\alpha = \gamma = \beta = 90^\circ$ ,  $U = 4075.91(9) \text{ \AA}^3$ ,  $T = 100$  K, space group  $Pa-3$ ,  $Z = 8$ , Independent reflections 1773,  $R_{\text{int}} = 0.0277$ ,  $R$  indices (all data)  $R_1 = 0.0548$ ,  $wR_2 = 0.1180$ .

**Quantum chemistry calculations** were performed using SPARTAN 10.1.0 package on a Dell Precision T5500 workstation. Calculations of molecular geometries in vacuum were done at the HF or DFT B3LYP level using the 6-31G\* basis set. Typically, calculations of the equilibrium geometry of  $[\text{Ph}_3\text{PXXXPPh}_3]$  in **1C-3C** were carried out starting with the crystallographically determined geometry of this unit in the absence of solvent molecules and individual halide anions.

| Structure | Level of theory and basis set | Computation time, h | Full energy, Hartrees |
|-----------|-------------------------------|---------------------|-----------------------|
| <b>1C</b> | HF 6-31G*                     | 5                   | -3440.464483          |
| <b>1C</b> | DFT B3LYP 6-31G*              | 1                   | -3453.016705          |
| <b>2C</b> | HF 6-31G*                     | 4                   | -9778.359007          |
| <b>2C</b> | DFT B3LYP 6-31G*              | 3                   | -9794.101734          |
| <b>3C</b> | HF 6-31G*                     | 1                   | -5553.100850          |
| <b>3C</b> | DFT B3LYP 6-31G*              | 4                   | -5566.713656          |

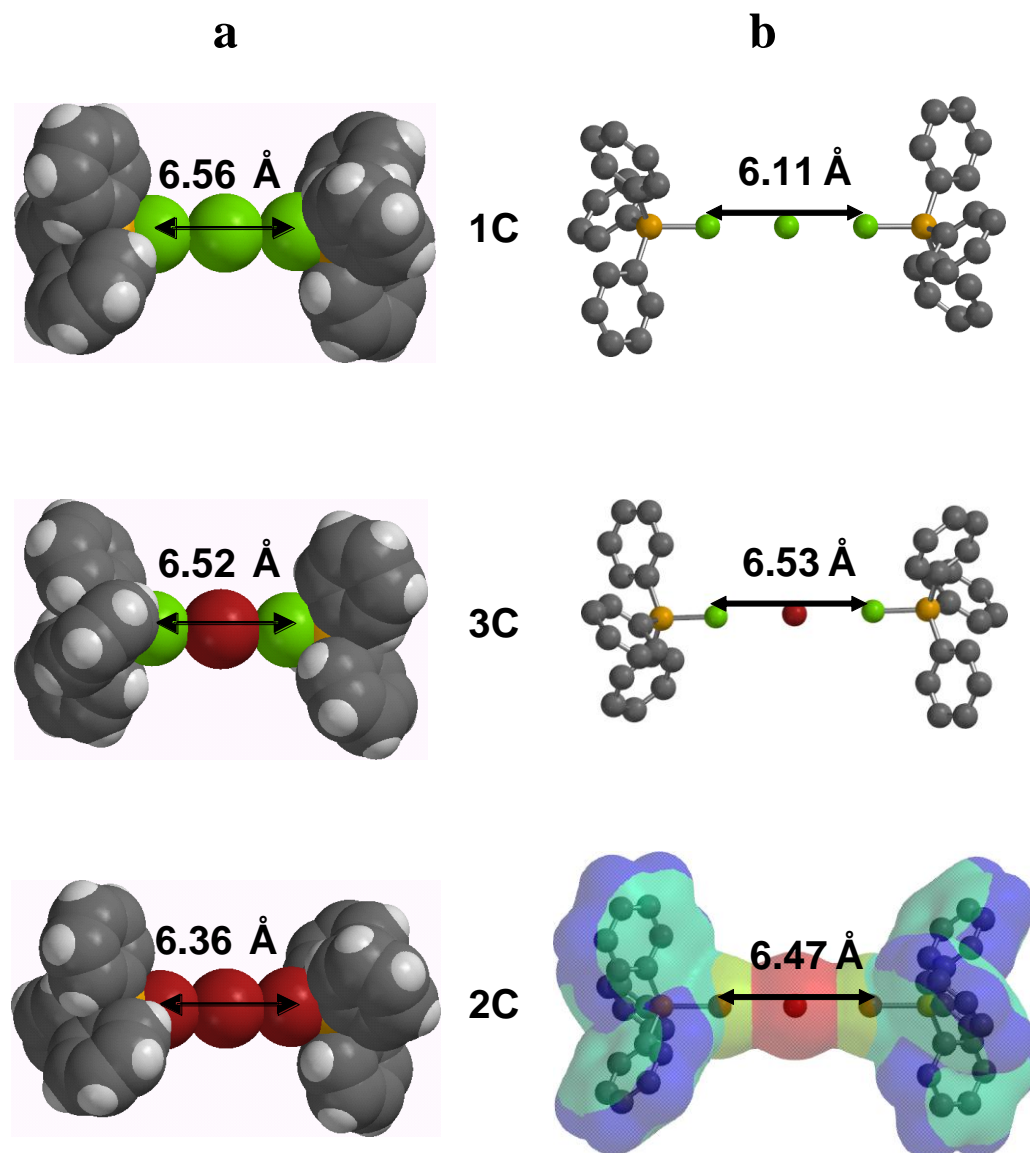

**Fig. S2** Comparison of 1C-3C: a) gradual contraction of the XXX bridge in crystal structure; b) calculated geometry in vacuum (electrostatic potential density surface shown for 2C).

**X-Ray measurements for 1-3:** Crystal data were collected using an Agilent Technologies (former Oxford Diffraction) SuperNova A diffractometer. A complete dataset was collected, assuming that the Friedel pairs are not equivalent. An analytical absorption correction based on the shape of the crystal was performed.<sup>S1</sup> The structures were solved by direct methods using SHELXS-97<sup>S2</sup> and refined by full-matrix least-squares on  $F^2$  for all data using SHELXL-97.<sup>S2</sup> Hydrogen atoms were added at calculated positions and refined using a riding model. Their thermal displacement parameters were fixed to 1.2 times the equivalent one of their parent atoms. Anisotropic thermal displacement parameters were refined for all non-hydrogen atoms. CCDC 887828 (**2C**) and 887829 (**3C**) contain the supplementary X-ray crystallographic data for this paper. These data can be obtained free of charge from the Cambridge Crystallographic Data Centre via [http://www.ccdc.cam.ac.uk/data\\_request/cif](http://www.ccdc.cam.ac.uk/data_request/cif).

**Acknowledgment.** We thank Science Foundation Ireland, University College Dublin, and the Centre for Synthesis and Chemical Biology funded by the Higher Education Authority's Programme for Research in Third-Level Institutions (PRTLII) for generous financial support.

References:

S1 Program CrysAlisPro Version 1.171.34.49, Agilent Technologies, 2011.

S2 G.M. Sheldrick, Acta Cryst. 2008, A64, 112.
